# Supplementary material
Source: publisher figshare collection journal article supplement (https://plos.figshare.com/articles/dataset/_/6107861)
Supplement: Supplementary file [file 1]

| Date      | Air temperature/ °C | Precipitation/mm |
|-----------|---------------------|------------------|
| 1/1/2014  | -2.9625             | 0                |
| 2/1/2014  | -0.9458             | 0                |
| 3/1/2014  | -1.1208             | 0                |
| 4/1/2014  | -0.8913             | 0                |
| 5/1/2014  | -2.25               | 0                |
| 6/1/2014  | -0.3042             | 0                |
| 7/1/2014  | -0.8208             | 0                |
| 8/1/2014  | -3.7375             | 0                |
| 9/1/2014  | -6.7958             | 0                |
| 10/1/2014 | -3.1292             | 0                |
| 11/1/2014 | -2.4375             | 0                |
| 12/1/2014 | -4.0542             | 0                |
| 13/1/2014 | -6.0833             | 0                |
| 14/1/2014 | -4.7333             | 0                |
| 15/1/2014 | -5.5792             | 0                |
| 16/1/2014 | -4.5917             | 0                |
| 17/1/2014 | -2.9625             | 0                |
| 18/1/2014 | -3.7333             | 0                |
| 19/1/2014 | 0.2417              | 0                |
| 20/1/2014 | -2.7                | 0                |
| 21/1/2014 | -3.7625             | 0                |
| 22/1/2014 | -2.1167             | 0                |
| 23/1/2014 | -0.3708             | 0                |
| 24/1/2014 | 3.7792              | 0                |
| 25/1/2014 | 0.8958              | 0                |
| 26/1/2014 | -0.0375             | 0                |
| 27/1/2014 | 1.1125              | 0                |
| 28/1/2014 | 2.8875              | 0                |
| 29/1/2014 | 2.7875              | 0                |
| 30/1/2014 | 5.9917              | 0                |
| 31/1/2014 | 7.5174              | 0                |
| 1/2/2014  | 5.0917              | 0                |
| 2/2/2014  | 4.8875              | 0                |
| 3/2/2014  | 3.0917              | 0                |
| 4/2/2014  | -2.925              | 0                |
| 5/2/2014  | -6.3083             | 0                |
| 6/2/2014  | -7.0333             | 0.8              |
| 7/2/2014  | -6.3708             | 1.8              |
| 8/2/2014  | -5.925              | 0.4              |
| 9/2/2014  | -7.2458             | 1                |
| 10/2/2014 | -9.0167             | 0                |
| 11/2/2014 | -6.1708             | 0                |
| 12/2/2014 | -5.4435             | 1                |
| 13/2/2014 | -4.7917             | 0                |
| 14/2/2014 | -4.4167             | 0                |
| 15/2/2014 | -3.0208             | 0                |
| 16/2/2014 | -1.9917             | 1.6              |

|           |         |     |
|-----------|---------|-----|
| 17/2/2014 | -2.7833 | 1.8 |
| 18/2/2014 | -1.2792 | 0   |
| 19/2/2014 | -1.4958 | 0   |
| 20/2/2014 | -0.175  | 0   |
| 21/2/2014 | 0.2375  | 0   |
| 22/2/2014 | 0.8292  | 0   |
| 23/2/2014 | 2.4625  | 0   |
| 24/2/2014 | 3.1     | 0.2 |
| 25/2/2014 | 2.7167  | 0.4 |
| 26/2/2014 | 3.7333  | 0   |
| 27/2/2014 | 2.1458  | 0   |
| 28/2/2014 | 0.7783  | 2.8 |
| 1/3/2014  | 0.9417  | 0   |
| 2/3/2014  | 1.3458  | 0   |
| 3/3/2014  | 0.7708  | 0   |
| 4/3/2014  | 2.6417  | 0   |
| 5/3/2014  | 1.2083  | 0.6 |
| 6/3/2014  | 1.1667  | 0   |
| 7/3/2014  | 0.4167  | 3.2 |
| 8/3/2014  | 1.6292  | 0   |
| 9/3/2014  | 4.0417  | 0   |
| 10/3/2014 | 7.475   | 0   |
| 11/3/2014 | 7.1875  | 0   |
| 12/3/2014 | 5.2417  | 0   |
| 13/3/2014 | 3.9292  | 0   |
| 14/3/2014 | 6.125   | 0   |
| 15/3/2014 | 9.675   | 0   |
| 16/3/2014 | 13.2292 | 0   |
| 17/3/2014 | 12.1958 | 0   |
| 18/3/2014 | 10.6875 | 0   |
| 19/3/2014 | 8.875   | 0   |
| 20/3/2014 | 6.2542  | 0   |
| 21/3/2014 | 4.8625  | 0   |
| 22/3/2014 | 8.7833  | 0   |
| 23/3/2014 | 10.1125 | 0   |
| 24/3/2014 | 11.5292 | 0   |
| 25/3/2014 | 13.3417 | 0   |
| 26/3/2014 | 15.2417 | 0   |
| 27/3/2014 | 12.7042 | 6   |
| 28/3/2014 | 9.8     | 0   |
| 29/3/2014 | 11.4833 | 0   |
| 30/3/2014 | 9.6174  | 13  |
| 31/3/2014 | 9.5     | 0   |
| 1/4/2014  | 9.5     | 0   |
| 2/4/2014  | 9.6208  | 0   |
| 3/4/2014  | 10.3    | 0   |
| 4/4/2014  | 9.2083  | 0   |
| 5/4/2014  | 10.9208 | 0   |

|           |         |      |
|-----------|---------|------|
| 6/4/2014  | 10.8125 | 0    |
| 7/4/2014  | 11.8042 | 0    |
| 8/4/2014  | 14.1042 | 0    |
| 9/4/2014  | 14.4    | 0.2  |
| 10/4/2014 | 12.9    | 4.4  |
| 11/4/2014 | 10.925  | 14.6 |
| 12/4/2014 | 11.3083 | 0.8  |
| 13/4/2014 | 11.4583 | 0.2  |
| 14/4/2014 | 12.8083 | 0    |
| 15/4/2014 | 12.1875 | 0    |
| 16/4/2014 | 11.3542 | 3    |
| 17/4/2014 | 10.7917 | 0    |
| 18/4/2014 | 10.875  | 28   |
| 19/4/2014 | 10.1958 | 4    |
| 20/4/2014 | 10.3208 | 1.2  |
| 21/4/2014 | 10.3    | 14   |
| 22/4/2014 | 10.5125 | 0    |
| 23/4/2014 | 13.475  | 0    |
| 24/4/2014 | 14.7375 | 1.4  |
| 25/4/2014 | 5.6625  | 11.6 |
| 26/4/2014 | 7.5792  | 0    |
| 27/4/2014 | 9.9     | 0    |
| 28/4/2014 | 12.3875 | 0    |
| 29/4/2014 | 14.2542 | 0    |
| 30/4/2014 | 15.5542 | 0    |
| 1/5/2014  | 13.9042 | 0    |
| 2/5/2014  | 12.4417 | 0    |
| 3/5/2014  | 12.1042 | 0    |
| 4/5/2014  | 13.15   | 0    |
| 5/5/2014  | 10.7792 | 0    |
| 6/5/2014  | 13.5917 | 0.2  |
| 7/5/2014  | 18.3542 | 0    |
| 8/5/2014  | 20.125  | 0    |
| 9/5/2014  | 12.15   | 8    |
| 10/5/2014 | 8.4958  | 9.8  |
| 11/5/2014 | 11.5667 | 0    |
| 12/5/2014 | 11.5708 | 0    |
| 13/5/2014 | 15.1042 | 0    |
| 14/5/2014 | 13.3125 | 0    |
| 15/5/2014 | 13.5083 | 0    |
| 16/5/2014 | 14.0167 | 0    |
| 17/5/2014 | 14.175  | 0    |
| 18/5/2014 | 15.9875 | 0    |
| 19/5/2014 | 17.225  | 2.6  |
| 20/5/2014 | 17.6125 | 0    |
| 21/5/2014 | 19.45   | 0    |
| 22/5/2014 | 19.4542 | 0    |
| 23/5/2014 | 17.2875 | 8.4  |

|           |         |      |
|-----------|---------|------|
| 24/5/2014 | 17.95   | 0.2  |
| 25/5/2014 | 16.6292 | 0    |
| 26/5/2014 | 17.1792 | 0    |
| 27/5/2014 | 19.6333 | 0    |
| 28/5/2014 | 0       | 0    |
| 29/5/2014 | 19.725  | 0    |
| 30/5/2014 | 19.8417 | 0    |
| 31/5/2014 | 18.9542 | 0    |
| 1/6/2014  | 18.9375 | 0    |
| 2/6/2014  | 20.0708 | 0    |
| 3/6/2014  | 20.0958 | 16.6 |
| 4/6/2014  | 18.9083 | 3.6  |
| 5/6/2014  | 19.6042 | 0    |
| 6/6/2014  | 18.8375 | 0    |
| 7/6/2014  | 16.7042 | 0    |
| 8/6/2014  | 19.2542 | 0    |
| 9/6/2014  | 20.7917 | 0    |
| 10/6/2014 | 20.9083 | 0    |
| 11/6/2014 | 21.9958 | 0    |
| 12/6/2014 | 18.3333 | 0.6  |
| 13/6/2014 | 16.6292 | 2.6  |
| 14/6/2014 | 17.2958 | 0.8  |
| 15/6/2014 | 19.8125 | 0    |
| 16/6/2014 | 22.7083 | 0    |
| 17/6/2014 | 21.8083 | 0    |
| 18/6/2014 | 22.4292 | 0    |
| 19/6/2014 | 19.7125 | 20   |
| 20/6/2014 | 18.6125 | 0    |
| 21/6/2014 | 20.3417 | 0    |
| 22/6/2014 | 21.2833 | 0    |
| 23/6/2014 | 21.6917 | 0    |
| 24/6/2014 | 20.0083 | 2    |
| 25/6/2014 | 17.8042 | 0.4  |
| 26/6/2014 | 19.4958 | 0.2  |
| 27/6/2014 | 22.7583 | 0    |
| 28/6/2014 | 19.0875 | 9    |
| 29/6/2014 | 20.4833 | 0.2  |
| 30/6/2014 | 21.9333 | 0    |
| 1/7/2014  | 21.8958 | 0    |
| 2/7/2014  | 21.9958 | 0    |
| 3/7/2014  | 21.3042 | 2.4  |
| 4/7/2014  | 21.5792 | 0    |
| 5/7/2014  | 22.6042 | 0    |
| 6/7/2014  | 24.2375 | 0    |
| 7/7/2014  | 25.5391 | 0    |
| 8/7/2014  | 22.75   | 1.4  |
| 9/7/2014  | 17.2583 | 13   |
| 10/7/2014 | 18.0833 | 1    |

|           |         |      |
|-----------|---------|------|
| 11/7/2014 | 18.5    | 0    |
| 12/7/2014 | 20.5    | 0    |
| 13/7/2014 | 21.8083 | 0    |
| 14/7/2014 | 22.8    | 0    |
| 15/7/2014 | 23.3522 | 0    |
| 16/7/2014 | 24.7833 | 0    |
| 17/7/2014 | 24.9667 | 0    |
| 18/7/2014 | 25.3    | 0    |
| 19/7/2014 | 25.2958 | 1.6  |
| 20/7/2014 | 24.2042 | 2.4  |
| 21/7/2014 | 25.8    | 0    |
| 22/7/2014 | 24.8792 | 0    |
| 23/7/2014 | 19.3083 | 0    |
| 24/7/2014 | 20.7    | 0    |
| 25/7/2014 | 21.6792 | 0    |
| 26/7/2014 | 23.3    | 0    |
| 27/7/2014 | 24.8083 | 0    |
| 28/7/2014 | 26.1391 | 0    |
| 29/7/2014 | 26.6583 | 0    |
| 30/7/2014 | 27.6875 | 0    |
| 31/7/2014 | 27.2125 | 0    |
| 1/8/2014  | 25.725  | 0    |
| 2/8/2014  | 24.7667 | 0    |
| 3/8/2014  | 25.3    | 0    |
| 4/8/2014  | 23.9125 | 0    |
| 5/8/2014  | 23.6125 | 25.4 |
| 6/8/2014  | 17.8083 | 43.6 |
| 7/8/2014  | 16.7708 | 0    |
| 8/8/2014  | 15.7167 | 22.2 |
| 9/8/2014  | 17.4375 | 1.6  |
| 10/8/2014 | 18.9042 | 0.2  |
| 11/8/2014 | 21.3083 | 4.8  |
| 12/8/2014 | 18.0583 | 7.6  |
| 13/8/2014 | 19.1458 | 0.2  |
| 14/8/2014 | 18.5833 | 0    |
| 15/8/2014 | 19.0708 | 0    |
| 16/8/2014 | 19.6208 | 1.4  |
| 17/8/2014 | 19.1042 | 4.2  |
| 18/8/2014 | 20.6875 | 0    |
| 19/8/2014 | 19.4958 | 0    |
| 20/8/2014 | 18.8958 | 0    |
| 21/8/2014 | 19.3167 | 0    |
| 22/8/2014 | 19.3458 | 0    |
| 23/8/2014 | 20.3    | 3.4  |
| 24/8/2014 | 19.275  | 0.2  |
| 25/8/2014 | 18.7542 | 0    |
| 26/8/2014 | 19.4542 | 0    |
| 27/8/2014 | 19.1458 | 0    |

|            |         |      |
|------------|---------|------|
| 28/8/2014  | 20.1667 | 0    |
| 29/8/2014  | 20.2792 | 0    |
| 30/8/2014  | 18.9083 | 20.8 |
| 31/8/2014  | 18.45   | 0    |
| 1/9/2014   | 17.17   | 2.4  |
| 2/9/2014   | 17.3708 | 0.2  |
| 3/9/2014   | 16.1875 | 0    |
| 4/9/2014   | 17.075  | 0    |
| 5/9/2014   | 18.9125 | 0    |
| 6/9/2014   | 19.2    | 0    |
| 7/9/2014   | 19.075  | 0    |
| 8/9/2014   | 17.7542 | 10.2 |
| 9/9/2014   | 17.9167 | 6.6  |
| 10/9/2014  | 17.2292 | 15.6 |
| 11/9/2014  | 16.3    | 28.1 |
| 12/9/2014  | 18      | 0    |
| 13/9/2014  | 14.5    | 4.6  |
| 14/9/2014  | 13.1    | 20.9 |
| 15/9/2014  | 13.1    | 11.5 |
| 16/9/2014  | 12.25   | 15.1 |
| 17/9/2014  | 13.85   | 17.5 |
| 18/9/2014  | 15.8    | 0    |
| 19/9/2014  | 13.3    | 0    |
| 20/9/2014  | 14.35   | 0.3  |
| 21/9/2014  | 15.15   | 0    |
| 22/9/2014  | 14.9    | 7.6  |
| 23/9/2014  | 12.6    | 15.7 |
| 24/9/2014  | 13.3    | 0    |
| 25/9/2014  | 12.7    | 0    |
| 26/9/2014  | 14.2    | 0    |
| 27/9/2014  | 14.95   | 12   |
| 28/9/2014  | 14.9    | 19.4 |
| 29/9/2014  | 13      | 0    |
| 30/9/2014  | 16.35   | 0    |
| 1/10/2014  | 15.15   | 0    |
| 2/10/2014  | 14.5125 | 0    |
| 3/10/2014  | 14.125  | 0    |
| 4/10/2014  | 14.7333 | 0    |
| 5/10/2014  | 15.1125 | 0    |
| 6/10/2014  | 16.4542 | 0    |
| 7/10/2014  | 14.8417 | 0    |
| 8/10/2014  | 14.525  | 0    |
| 9/10/2014  | 14.9417 | 0    |
| 10/10/2014 | 15.6957 | 0    |
| 11/10/2014 | 14.3875 | 0    |
| 12/10/2014 | 16.0375 | 0    |
| 13/10/2014 | 15.1208 | 0    |
| 14/10/2014 | 11.8375 | 14.2 |

|            |         |      |
|------------|---------|------|
| 15/10/2014 | 8.4958  | 0    |
| 16/10/2014 | 9.0792  | 0    |
| 17/10/2014 | 8.0583  | 0    |
| 18/10/2014 | 8.0458  | 0    |
| 19/10/2014 | 8.725   | 0    |
| 20/10/2014 | 7.1125  | 0.4  |
| 21/10/2014 | 6.1875  | 0    |
| 22/10/2014 | 8.2167  | 0    |
| 23/10/2014 | 9.1     | 0    |
| 24/10/2014 | 9.0542  | 0    |
| 25/10/2014 | 6.25    | 0    |
| 26/10/2014 | 7.8333  | 0    |
| 27/10/2014 | 8.9083  | 0    |
| 28/10/2014 | 7.5167  | 0    |
| 29/10/2014 | 9.4125  | 0.8  |
| 30/10/2014 | 6.6208  | 13.2 |
| 31/10/2014 | 7.1     | 2.8  |
| 1/11/2014  | 7.95    | 1.2  |
| 2/11/2014  | 6.6083  | 0    |
| 3/11/2014  | 3.9708  | 0    |
| 4/11/2014  | 6.6958  | 2    |
| 5/11/2014  | 7.0792  | 0.2  |
| 6/11/2014  | 4.49    | 0    |
| 7/11/2014  | 4.6     | 0    |
| 8/11/2014  | 8.2783  | 0    |
| 9/11/2014  | 6.9292  | 3.6  |
| 10/11/2014 | 3.9958  | 0    |
| 11/11/2014 | 4.0833  | 0    |
| 12/11/2014 | 4.7708  | 0    |
| 13/11/2014 | 5.7667  | 0    |
| 14/11/2014 | 3.2125  | 0    |
| 15/11/2014 | 2.2708  | 0    |
| 16/11/2014 | 3.3625  | 0    |
| 17/11/2014 | 1.025   | 0    |
| 18/11/2014 | 0.7042  | 0    |
| 19/11/2014 | 1.0042  | 0    |
| 20/11/2014 | 2.6167  | 0    |
| 21/11/2014 | 1.7333  | 0    |
| 22/11/2014 | 1.6625  | 5.6  |
| 23/11/2014 | 0.4167  | 4    |
| 24/11/2014 | 0.7917  | 0.8  |
| 25/11/2014 | 0.56    | 0    |
| 26/11/2014 | 0.225   | 0    |
| 27/11/2014 | -0.9583 | 0    |
| 28/11/2014 | -2.3417 | 0    |
| 29/11/2014 | -2.45   | 0    |
| 30/11/2014 | 1.5     | 0    |
| 1/12/2014  | 0.5375  | 0    |

|            |         |   |
|------------|---------|---|
| 2/12/2014  | 1.9667  | 0 |
| 3/12/2014  | 0.68    | 0 |
| 4/12/2014  | 0.15    | 0 |
| 5/12/2014  | 0.34    | 0 |
| 6/12/2014  | 0.12    | 0 |
| 7/12/2014  | 0.6458  | 0 |
| 8/12/2014  | 2.5083  | 0 |
| 9/12/2014  | -2.2375 | 0 |
| 10/12/2014 | -2.6792 | 0 |
| 11/12/2014 | -3.9958 | 0 |
| 12/12/2014 | -2.8333 | 0 |
| 13/12/2014 | -2.9167 | 0 |
| 14/12/2014 | -0.7333 | 0 |
| 15/12/2014 | -0.2    | 0 |
| 16/12/2014 | -1.9292 | 0 |
| 17/12/2014 | -2.3917 | 0 |
| 18/12/2014 | -3.6667 | 0 |
| 19/12/2014 | -5.4348 | 0 |
| 20/12/2014 | -2.6292 | 0 |
| 21/12/2014 | -3.4208 | 0 |
| 22/12/2014 | -4.7583 | 0 |
| 23/12/2014 | -4.5792 | 0 |
| 24/12/2014 | -2.4792 | 0 |
| 25/12/2014 | -4      | 0 |
| 26/12/2014 | -5.9208 | 0 |
| 27/12/2014 | -8.7833 | 0 |
| 28/12/2014 | -5.6458 | 0 |
| 29/12/2014 | -6.5375 | 0 |
| 30/12/2014 | -2.5958 | 0 |
| 31/12/2014 | -1.3875 | 0 |
| 1/1/2015   | -6.05   | 0 |
| 2/1/2015   | 0.26    | 0 |
| 3/1/2015   | -2.14   | 0 |
| 4/1/2015   | 0.45    | 0 |
| 5/1/2015   |         |   |
| 6/1/2015   | -1.45   | 0 |
| 7/1/2015   | -3.85   | 0 |
| 8/1/2015   | -0.36   | 0 |
| 9/1/2015   | -0.85   | 0 |
| 10/1/2015  | -0.7    | 0 |
| 11/1/2015  | -0.85   | 0 |
| 12/1/2015  | -0.59   | 0 |
| 13/1/2015  | -0.7    | 0 |
| 14/1/2015  | -1.33   | 0 |
| 15/1/2015  | -1.1    | 0 |
| 16/1/2015  | -1.98   | 0 |
| 17/1/2015  | -2.02   | 0 |
| 18/1/2015  | -0.63   | 0 |



|           |       |     |
|-----------|-------|-----|
| 19/1/2015 | -0.47 | 0   |
| 20/1/2015 | 2.37  | 0   |
| 21/1/2015 | -0.91 | 0   |
| 22/1/2015 | -1.72 | 0   |
| 23/1/2015 | -0.77 | 0   |
| 24/1/2015 | 2.99  | 0   |
| 25/1/2015 | -0.73 | 0   |
| 26/1/2015 | 0.72  | 0   |
| 27/1/2015 | -1.52 | 1.2 |
| 28/1/2015 | -5.75 | 0   |
| 29/1/2015 | -5.63 | 2.6 |
| 30/1/2015 | -7.36 | 0.4 |
| 31/1/2015 | -6.13 | 1.2 |
| 1/2/2015  | -5.31 | 0   |
| 2/2/2015  | -3.73 | 0   |
| 3/2/2015  | -2.65 | 0   |
| 4/2/2015  | -1.75 | 0   |
| 5/2/2015  | -3.71 | 0   |
| 6/2/2015  | -3.05 | 0   |
| 7/2/2015  | -0.66 | 0   |
| 8/2/2015  | -2.49 | 0   |
| 9/2/2015  | -1.5  | 0   |
| 10/2/2015 | 0     | 0   |
| 11/2/2015 | 4.07  | 0   |
| 12/2/2015 | 3.42  | 0   |
| 13/2/2015 | 3.39  | 0   |
| 14/2/2015 | 5.14  | 0   |
| 15/2/2015 | 6.17  | 0   |
| 16/2/2015 | 2.88  | 0   |
| 17/2/2015 | 4.14  | 0   |
| 18/2/2015 | 2.43  | 0   |
| 19/2/2015 | 1.03  | 1.2 |
| 20/2/2015 | 2.66  | 0   |
| 21/2/2015 | 3.38  | 0   |
| 22/2/2015 | 0.89  | 0   |
| 23/2/2015 | 2.58  | 0   |
| 24/2/2015 | 2.84  | 0   |
| 25/2/2015 | 4.37  | 0   |
| 26/2/2015 | 1.85  | 0   |
| 27/2/2015 | 0.63  | 4   |
| 28/2/2015 | 0.05  | 0   |
| 1/3/2015  | -0.42 | 0   |
| 2/3/2015  | 2.13  | 0   |
| 3/3/2015  | 0.28  | 0   |
| 4/3/2015  | -1.44 | 3.4 |
| 5/3/2015  | -2.26 | 2.6 |
| 6/3/2015  | -1.79 | 0   |
| 7/3/2015  | 2.59  | 0   |

|           |       |      |
|-----------|-------|------|
| 8/3/2015  | 7.68  | 0    |
| 9/3/2015  | 3.61  | 0    |
| 10/3/2015 |       |      |
| 11/3/2015 | 2.98  | 0    |
| 12/3/2015 | 6.74  | 0    |
| 13/3/2015 | 10.31 | 0    |
| 14/3/2015 | 9.81  | 0    |
| 15/3/2015 | 9.28  | 0    |
| 16/3/2015 | 10.32 | 0    |
| 17/3/2015 | 12.63 | 2    |
| 18/3/2015 | 7.01  | 5    |
| 19/3/2015 | 6.85  | 3.6  |
| 20/3/2015 | 7.15  | 0    |
| 21/3/2015 | 9.35  | 0    |
| 22/3/2015 | 7.82  | 0.2  |
| 23/3/2015 | 8.85  | 1.4  |
| 24/3/2015 | 6.13  | 7.2  |
| 25/3/2015 | 4.53  | 1.8  |
| 26/3/2015 | 4.55  | 0    |
| 27/3/2015 | 5.62  | 0    |
| 28/3/2015 | 8.95  | 0    |
| 29/3/2015 | 13.38 | 0    |
| 30/3/2015 | 14.94 | 0    |
| 31/3/2015 | 13.93 | 0    |
| 1/4/2015  | 11.46 | 15   |
| 2/4/2015  | 11.09 | 0.2  |
| 3/4/2015  | 8.8   | 1    |
| 4/4/2015  | 6.68  | 3.8  |
| 5/4/2015  | 7.83  | 3.2  |
| 6/4/2015  | 5.54  | 2.6  |
| 7/4/2015  | 5.52  | 0    |
| 8/4/2015  | 6.65  | 0    |
| 9/4/2015  | 8.82  | 0    |
| 10/4/2015 | 10.25 | 0    |
| 11/4/2015 | 12.88 | 0.4  |
| 12/4/2015 |       | 0    |
| 13/4/2015 | 7.44  | 0    |
| 14/4/2015 | 9.66  | 0    |
| 15/4/2015 | 15.83 | 0    |
| 16/4/2015 | 15.8  | 0    |
| 17/4/2015 | 13.07 | 0    |
| 18/4/2015 | 10.81 | 11.6 |
| 19/4/2015 | 11.72 | 6.2  |
| 20/4/2015 | 10.38 | 4.2  |
| 21/4/2015 | 11.86 | 8.4  |
| 22/4/2015 | 12.78 | 0    |
| 23/4/2015 | 13.3  | 0    |
| 24/4/2015 | 14    | 0.2  |

|           |       |      |
|-----------|-------|------|
| 25/4/2015 | 13.82 | 0    |
| 26/4/2015 | 14.73 | 0    |
| 27/4/2015 | 16.39 | 0    |
| 28/4/2015 | 19.11 | 0    |
| 29/4/2015 | 17.57 | 0    |
| 30/4/2015 | 17.4  | 0.6  |
| 1/5/2015  | 12.44 | 10.4 |
| 2/5/2015  | 14.05 | 0    |
| 3/5/2015  | 14.75 | 0.2  |
| 4/5/2015  | 14.24 | 0    |
| 5/5/2015  | 15.18 | 0    |
| 6/5/2015  | 14.82 | 0    |
| 7/5/2015  | 13.58 | 0    |
| 8/5/2015  | 13.83 | 0    |
| 9/5/2015  | 17.48 | 0.4  |
| 10/5/2015 | 12.13 | 0.6  |
| 11/5/2015 | 10.56 | 0    |
| 12/5/2015 | 12.03 | 0    |
| 13/5/2015 | 17.89 | 0    |
| 14/5/2015 | 17.15 | 0    |
| 15/5/2015 | 17.3  | 0    |
| 16/5/2015 |       |      |
| 17/5/2015 | 18.67 | 0    |
| 18/5/2015 | 21.32 | 0    |
| 19/5/2015 | 20.69 | 0    |
| 20/5/2015 | 18.38 | 2.2  |
| 21/5/2015 | 11.66 | 10.6 |
| 22/5/2015 | 14.67 | 0    |
| 23/5/2015 | 16.78 | 0    |
| 24/5/2015 | 17.16 | 0    |
| 25/5/2015 | 17.36 | 0    |
| 26/5/2015 | 18.4  | 0    |
| 27/5/2015 | 18.93 | 0    |
| 28/5/2015 | 16.36 | 6    |
| 29/5/2015 | 17.7  | 2    |
| 30/5/2015 | 17.08 | 20.4 |
| 31/5/2015 | 13.79 | 2.6  |
| 1/6/2015  | 16.8  | 5.4  |
| 2/6/2015  | 17.7  | 0    |
| 3/6/2015  | 15.49 | 14   |
| 4/6/2015  | 16.95 | 0.6  |
| 5/6/2015  | 19.4  | 0    |
| 6/6/2015  | 21.53 | 0    |
| 7/6/2015  | 18.62 | 0    |
| 8/6/2015  | 18.25 | 0    |
| 9/6/2015  | 20.16 | 0    |
| 10/6/2015 | 18.81 | 0.6  |
| 11/6/2015 | 19.44 | 0    |

|           |       |      |
|-----------|-------|------|
| 12/6/2015 | 17.65 | 0    |
| 13/6/2015 | 19.62 | 0    |
| 14/6/2015 | 20.07 | 0    |
| 15/6/2015 | 16.37 | 2.8  |
| 16/6/2015 | 16.9  | 0    |
| 17/6/2015 | 18.59 | 0    |
| 18/6/2015 | 22.59 | 0    |
| 19/6/2015 | 21.14 | 1    |
| 20/6/2015 | 18.25 | 0.2  |
| 21/6/2015 | 18.1  | 0.2  |
| 22/6/2015 | 19.05 | 0    |
| 23/6/2015 | 16.98 | 34.4 |
| 24/6/2015 | 17.63 | 3.4  |
| 25/6/2015 | 19.34 | 0.8  |
| 26/6/2015 | 18.42 | 3.2  |
| 27/6/2015 | 17.63 | 5.4  |
| 28/6/2015 | 17.72 | 9.6  |
| 29/6/2015 | 20.37 | 12   |
| 30/6/2015 | 23.32 | 0    |
| 1/7/2015  | 23.15 | 0    |
| 2/7/2015  | 22.31 | 0    |
| 3/7/2015  | 21.18 | 0    |
| 4/7/2015  | 19.3  | 0    |
| 5/7/2015  | 20.11 | 0    |
| 6/7/2015  | 20.1  | 0    |
| 7/7/2015  | 21.32 | 0    |
| 8/7/2015  |       |      |
| 9/7/2015  | 20.61 | 0    |
| 10/7/2015 | 19.85 | 0    |
| 11/7/2015 |       |      |
| 12/7/2015 | 23.27 | 0    |
| 13/7/2015 | 25.23 | 0    |
| 14/7/2015 | 22.12 | 0    |
| 15/7/2015 | 21.78 | 0    |
| 16/7/2015 | 19.71 | 4.4  |
| 17/7/2015 | 19.86 | 1.6  |
| 18/7/2015 | 20.75 | 0.2  |
| 19/7/2015 |       |      |
| 20/7/2015 | 20.07 | 0    |
| 21/7/2015 | 21.65 | 0    |
| 22/7/2015 | 22.19 | 0    |
| 23/7/2015 |       |      |
| 24/7/2015 |       |      |
| 25/7/2015 | 22.67 | 0    |
| 26/7/2015 | 23.44 | 0    |
| 27/7/2015 | 23.7  | 0    |
| 28/7/2015 | 25.74 | 0    |
| 29/7/2015 | 25.41 | 0    |

|           |       |      |
|-----------|-------|------|
| 30/7/2015 | 25.45 | 0    |
| 31/7/2015 | 25.96 | 0    |
| 1/8/2015  | 26.74 | 0    |
| 2/8/2015  | 25.13 | 2.4  |
| 3/8/2015  | 18.95 | 7.6  |
| 4/8/2015  | 17.03 | 4.6  |
| 5/8/2015  | 17.8  | 0    |
| 6/8/2015  | 21.86 | 0    |
| 7/8/2015  | 21.48 | 0    |
| 8/8/2015  | 21.45 | 0.6  |
| 9/8/2015  | 19.88 | 0.8  |
| 10/8/2015 | 20.38 | 1.6  |
| 11/8/2015 | 21.17 | 12.2 |
| 12/8/2015 | 19.22 | 86.6 |
| 13/8/2015 | 20.57 | 0    |
| 14/8/2015 | 19.38 | 1.2  |
| 15/8/2015 | 18.76 | 0    |
| 16/8/2015 | 19.73 | 0.4  |
| 17/8/2015 | 18.33 | 0.8  |
| 18/8/2015 | 17.48 | 0    |
| 19/8/2015 | 19.2  | 0    |
| 20/8/2015 | 20.36 | 0    |
| 21/8/2015 | 19.56 | 0    |
| 22/8/2015 | 19.85 | 0    |
| 23/8/2015 | 19.23 | 0    |
| 24/8/2015 | 17.58 | 0    |
| 25/8/2015 | 18.22 | 0    |
| 26/8/2015 | 19.29 | 10.4 |
| 27/8/2015 | 18.82 | 0.2  |
| 28/8/2015 | 19.46 | 0    |
| 29/8/2015 | 19.39 | 0    |
| 30/8/2015 | 20.27 | 0    |
| 31/8/2015 | 19.5  | 0.2  |
| 1/9/2015  | 19.37 | 0    |
| 2/9/2015  | 18.51 | 0    |
| 3/9/2015  | 17.35 | 11.6 |
| 4/9/2015  | 19.56 | 5.6  |
| 5/9/2015  | 20.77 | 0    |
| 6/9/2015  | 19.41 | 0    |
| 7/9/2015  | 18.1  | 0.4  |
| 8/9/2015  | 16.93 | 6.8  |
| 9/9/2015  | 16.19 | 7    |
| 10/9/2015 | 15.68 | 8.2  |
| 11/9/2015 | 15.21 | 0    |
| 12/9/2015 | 14.4  | 0    |
| 13/9/2015 | 15.33 | 0    |
| 14/9/2015 | 14.96 | 0    |
| 15/9/2015 | 16.13 | 0    |

|            |       |     |
|------------|-------|-----|
| 16/9/2015  | 16.02 | 0   |
| 17/9/2015  | 15.2  | 2   |
| 18/9/2015  | 15.98 | 0   |
| 19/9/2015  | 15.26 | 0   |
| 20/9/2015  | 15.25 | 0   |
| 21/9/2015  | 16.2  | 0   |
| 22/9/2015  | 15.85 | 7.6 |
| 23/9/2015  | 12    | 0   |
| 24/9/2015  | 13.25 | 5   |
| 25/9/2015  | 14.42 | 0   |
| 26/9/2015  | 15.42 | 0   |
| 27/9/2015  | 15.56 | 0   |
| 28/9/2015  | 14.09 | 1.2 |
| 29/9/2015  | 13.68 | 1.8 |
| 30/9/2015  | 12.06 | 4.4 |
| 29/9/2015  | 8.93  | 0   |
| 30/9/2015  | 6.3   | 0   |
| 1/10/2015  | 8.18  | 0   |
| 2/10/2015  | 11.3  | 0   |
| 3/10/2015  | 11.16 | 0   |
| 4/10/2015  | 11.61 | 3   |
| 5/10/2015  | 13.6  | 0   |
| 6/10/2015  | 9.65  | 3.4 |
| 7/10/2015  | 8.14  | 0   |
| 8/10/2015  | 8.83  | 0   |
| 9/10/2015  | 7.37  | 0   |
| 10/10/2015 | 8.48  | 0   |
| 11/10/2015 | 8.71  | 1   |
| 12/10/2015 | 10.93 | 0   |
| 13/10/2015 | 11.48 | 0   |
| 14/10/2015 | 13.2  | 0   |
| 15/10/2015 | 15.22 | 0   |
| 16/10/2015 | 12.15 | 0   |
| 17/10/2015 | 10.55 | 0   |
| 18/10/2015 | 12.42 | 0   |
| 19/10/2015 | 12.82 | 0   |
| 20/10/2015 | 9.76  | 0.2 |
| 21/10/2015 | 10.6  | 0.2 |
| 22/10/2015 | 10.46 | 19  |
| 23/10/2015 | 9.58  | 6.6 |
| 24/10/2015 | 6.33  | 5.6 |
| 25/10/2015 | 3.84  | 0   |
| 26/10/2015 | 7.48  | 0   |
| 27/10/2015 | 6.97  | 0   |
| 28/10/2015 | 6.32  | 2.4 |
| 29/10/2015 | 2.98  | 2.2 |
| 30/10/2015 | 3.05  | 0   |
| 31/10/2015 | 4.26  | 0   |

|            |        |     |
|------------|--------|-----|
| 1/11/2015  | 8.57   | 0   |
| 2/11/2015  | 9.42   | 0.4 |
| 3/11/2015  | 7.41   | 5.6 |
| 4/11/2015  | 6.64   | 8.6 |
| 5/11/2015  | 4.59   | 0.2 |
| 6/11/2015  | 2.44   | 0   |
| 7/11/2015  | 2.78   | 0   |
| 8/11/2015  | 6.6    | 0   |
| 9/11/2015  | 5.68   | 0   |
| 10/11/2015 | 4.4    | 1.8 |
| 11/11/2015 | 4.85   | 0   |
| 12/11/2015 | 4.96   | 0   |
| 13/11/2015 | 6.6    | 0   |
| 14/11/2015 | 4.29   | 0   |
| 15/11/2015 | 5.64   | 2.4 |
| 16/11/2015 | 5.18   | 0   |
| 17/11/2015 | 5.38   | 0   |
| 18/11/2015 | 3.33   | 0   |
| 19/11/2015 | 4.93   | 0.2 |
| 20/11/2015 | 5.8    | 0   |
| 21/11/2015 | 5.5    | 3.8 |
| 22/11/2015 | 2.66   | 4.4 |
| 23/11/2015 | 0.51   | 0   |
| 24/11/2015 | -0.14  | 0   |
| 25/11/2015 | 1.3    | 0   |
| 26/11/2015 | 1.75   | 0   |
| 27/11/2015 | 2.75   | 0   |
| 28/11/2015 | 2.95   | 0   |
| 29/11/2015 | 3.96   | 0   |
| 30/11/2015 | 2.37   | 0   |
| 1/12/2015  | -1.23  | 0   |
| 2/12/2015  | -2.62  | 0   |
| 3/12/2015  | -0.2   | 0   |
| 4/12/2015  | -0.91  | 0   |
| 5/12/2015  | 0.89   | 0   |
| 6/12/2015  | -1.1   | 0   |
| 7/12/2015  | -0.02  | 0   |
| 8/12/2015  | 0.27   | 0   |
| 9/12/2015  | -0.31  | 0.4 |
| 10/12/2015 | -1.02  | 4.6 |
| 11/12/2015 | -1.78  | 2.6 |
| 12/12/2015 | -5.09  | 0   |
| 13/12/2015 | -5.48  | 0   |
| 14/12/2015 | -7.9   | 0   |
| 15/12/2015 | -10.19 | 0   |
| 16/12/2015 | -5.84  | 0   |
| 17/12/2015 | -3.3   | 0   |
| 18/12/2015 | -5.94  | 0   |

|            |        |     |
|------------|--------|-----|
| 19/12/2015 | -2.79  | 0   |
| 20/12/2015 | -1.52  | 0   |
| 21/12/2015 | -4.84  | 0   |
| 22/12/2015 | -2.25  | 0   |
| 23/12/2015 | -2.18  | 0   |
| 24/12/2015 | -1.86  | 0   |
| 25/12/2015 | -1.42  | 0   |
| 26/12/2015 | -3.25  | 0   |
| 27/12/2015 | -1.91  | 0   |
| 28/12/2015 | -1.41  | 0   |
| 29/12/2015 | -0.46  | 0   |
| 30/12/2015 | 3.43   | 0   |
| 31/12/2015 | 0.77   | 0   |
| 1/1/2016   | 3.43   | 0   |
| 2/1/2016   | 0.77   | 0   |
| 3/1/2016   | 2.75   | 0   |
| 4/1/2016   | 2.93   | 0   |
| 5/1/2016   | 0.58   | 0   |
| 6/1/2016   | -2.72  | 0   |
| 7/1/2016   | -0.94  | 0   |
| 8/1/2016   | -4.07  | 0   |
| 9/1/2016   | -2.53  | 0   |
| 10/1/2016  | -2.17  | 0   |
| 11/1/2016  | -2.79  | 0   |
| 12/1/2016  | -4.35  | 1.6 |
| 13/1/2016  | -8.02  | 0   |
| 14/1/2016  | -4.95  | 0   |
| 15/1/2016  | -4.95  | 0   |
| 16/1/2016  | -0.64  | 0   |
| 17/1/2016  | -1.32  | 0   |
| 18/1/2016  | -3.68  | 0   |
| 19/1/2016  | -5.49  | 0   |
| 20/1/2016  | -4.64  | 1   |
| 21/1/2016  | -4.25  | 0   |
| 22/1/2016  | -7.9   | 0   |
| 23/1/2016  | -11.24 | 0   |
| 24/1/2016  | -14.03 | 0   |
| 25/1/2016  | -12.13 | 0   |
| 26/1/2016  | -8.51  | 0   |
| 27/1/2016  | -7.3   | 0   |
| 28/1/2016  | -4.03  | 0   |
| 29/1/2016  | -4.55  | 0   |
| 30/1/2016  | -3.23  | 0   |
| 31/1/2016  | -5.6   | 0   |
| 1/2/2016   | -7.38  | 0   |
| 2/2/2016   | -6.42  | 0   |
| 3/2/2016   | -3.84  | 0   |
| 4/2/2016   | -0.32  | 0   |



|           |       |     |
|-----------|-------|-----|
| 5/2/2016  | -2.5  | 0   |
| 6/2/2016  | -3.78 | 0   |
| 7/2/2016  | 3.65  | 0   |
| 8/2/2016  | 2.39  | 0   |
| 9/2/2016  | 2.82  | 0   |
| 10/2/2016 | 3.68  | 0   |
| 11/2/2016 | 3.4   | 0   |
| 12/2/2016 | -1.14 | 0.8 |
| 13/2/2016 | -6.77 | 0   |
| 14/2/2016 | -7.59 | 0.2 |
| 15/2/2016 | -7.8  | 0   |
| 16/2/2016 | -3.24 | 0   |
| 17/2/2016 | -1.31 | 0   |
| 18/2/2016 | 1.03  | 0   |
| 19/2/2016 | 0.48  | 0   |
| 20/2/2016 | -1.2  | 0   |
| 21/2/2016 | -2.47 | 0   |
| 22/2/2016 | -0.73 | 0   |
| 23/2/2016 | 1.32  | 0   |
| 24/2/2016 | 1.89  | 0   |
| 25/2/2016 | 3.58  | 0   |
| 26/2/2016 | 4.53  | 0   |
| 27/2/2016 | 7.8   | 0   |
| 28/2/2016 | 6.79  | 0   |
| 29/2/2016 | 3     | 0   |
| 1/3/2016  | 4.7   | 0   |
| 2/3/2016  | 7.99  | 0   |
| 3/3/2016  | 9.07  | 0   |
| 4/3/2016  | 7.01  | 0   |
| 5/3/2016  | 2.95  | 0   |
| 6/3/2016  | 7.29  | 0   |
| 7/3/2016  | 6.96  | 0.4 |
| 8/3/2016  | 3.58  | 0   |
| 9/3/2016  | -0.28 | 5.4 |
| 10/3/2016 | -4.2  | 0   |
| 11/3/2016 | 1.25  | 0   |
| 12/3/2016 | 4.13  | 0   |
| 13/3/2016 | 5.5   | 0   |
| 14/3/2016 | 5.31  | 0   |
| 15/3/2016 | 8.97  | 0   |
| 16/3/2016 | 7.95  | 0   |
| 17/3/2016 | 9.37  | 0   |
| 18/3/2016 | 9.87  | 0   |
| 19/3/2016 | 13.06 | 0   |
| 20/3/2016 | 11.84 | 0   |
| 21/3/2016 | 7.75  | 2.8 |
| 22/3/2016 | 8.03  | 1   |
| 23/3/2016 | 7.04  | 3.8 |

|           |       |      |
|-----------|-------|------|
| 24/3/2016 | 6.08  | 2.8  |
| 25/3/2016 | 5.2   | 0.8  |
| 26/3/2016 | 4.95  | 0    |
| 27/3/2016 | 6.13  | 0    |
| 28/3/2016 | 10.7  | 0    |
| 29/3/2016 | 12.29 | 0    |
| 30/3/2016 | 12.07 | 0    |
| 31/3/2016 | 15.18 | 0    |
| 1/4/2016  | 16.36 | 0    |
| 2/4/2016  | 15.39 | 0    |
| 3/4/2016  | 9.17  | 0    |
| 4/4/2016  | 6.8   | 1.8  |
| 5/4/2016  | 7.75  | 0.4  |
| 6/4/2016  | 11.16 | 1.4  |
| 7/4/2016  | 13.33 | 0    |
| 8/4/2016  | 12.8  | 1.2  |
| 9/4/2016  | 11.02 | 0.4  |
| 10/4/2016 | 13.83 | 0    |
| 11/4/2016 | 15.59 | 0.2  |
| 12/4/2016 | 13.64 | 0    |
| 13/4/2016 | 11.25 | 0    |
| 14/4/2016 | 12.48 | 0    |
| 15/4/2016 | 11.13 | 19.2 |
| 16/4/2016 | 9.6   | 0    |
| 17/4/2016 | 10.25 | 0.2  |
| 18/4/2016 | 11.57 | 0    |
| 19/4/2016 | 13.53 | 0    |
| 20/4/2016 | 15.88 | 0    |
| 21/4/2016 | 14.75 | 0    |
| 22/4/2016 | 13.74 | 0    |
| 23/4/2016 |       |      |
| 24/4/2016 | 14.06 | 0    |
| 25/4/2016 | 13.18 | 2.6  |
| 26/4/2016 | 14.9  | 0    |
| 27/4/2016 | 16.3  | 0    |
| 28/4/2016 | 15.58 | 0    |
| 29/4/2016 | 17.18 | 0    |
| 30/4/2016 | 19.06 | 0    |
| 1/5/2016  | 19.47 | 0    |
| 2/5/2016  | 12.51 | 8    |
| 3/5/2016  | 12.46 | 0    |
| 4/5/2016  | 17.73 | 0    |
| 5/5/2016  | 20.86 | 0    |
| 6/5/2016  | 14.96 | 0    |
| 7/5/2016  | 8.31  | 7.2  |
| 8/5/2016  | 8.85  | 0    |
| 9/5/2016  | 14.47 | 0    |
| 10/5/2016 | 16.95 | 0    |

|           |       |      |
|-----------|-------|------|
| 11/5/2016 | 21.13 | 0    |
| 12/5/2016 | 14.45 | 0    |
| 13/5/2016 | 6.07  | 0.8  |
| 14/5/2016 | 9.14  | 11.4 |
| 15/5/2016 | 12.21 | 0    |
| 16/5/2016 | 12.56 | 0    |
| 17/5/2016 | 16.63 | 0    |
| 18/5/2016 | 18.28 | 0    |
| 19/5/2016 | 17.4  | 0    |
| 20/5/2016 | 16.58 | 0    |
| 21/5/2016 | 17.19 | 0    |
| 22/5/2016 | 16.19 | 0.8  |
| 23/5/2016 | 13.42 | 1.8  |
| 24/5/2016 | 15.01 | 0    |
| 25/5/2016 | 12.67 | 1.8  |
| 26/5/2016 | 11.34 | 0    |
| 27/5/2016 | 10.3  | 5.2  |
| 28/5/2016 | 13.57 | 0    |
| 29/5/2016 | 16.38 | 0    |
| 30/5/2016 | 18    | 0    |
| 31/5/2016 | 18.6  | 0.6  |
| 1/6/2016  | 15.3  | 4    |
| 2/6/2016  | 12.61 | 11.2 |
| 3/6/2016  | 16.59 | 0.8  |
| 4/6/2016  | 19.31 | 1    |
| 5/6/2016  | 21.09 | 0    |
| 6/6/2016  | 19.89 | 0    |
| 7/6/2016  | 20.43 | 1.8  |
| 8/6/2016  | 18.69 | 0    |
| 9/6/2016  | 17.62 | 6.2  |
| 10/6/2016 | 20.71 | 0    |
| 11/6/2016 | 21.17 | 0.4  |
| 12/6/2016 | 18.45 | 0    |
| 13/6/2016 | 20.88 | 0    |
| 14/6/2016 | 21.96 | 8.8  |
| 15/6/2016 | 19.47 | 0    |
| 16/6/2016 | 18.52 | 0    |
| 17/6/2016 | 22.74 | 0    |
| 18/6/2016 | 24.06 | 0    |
| 19/6/2016 | 23.64 | 5.2  |
| 20/6/2016 | 22.96 | 0    |
| 21/6/2016 | 22.86 | 0    |
| 22/6/2016 | 22.74 | 0    |
| 23/6/2016 | 19.67 | 11   |
| 24/6/2016 | 17.84 | 0    |
| 25/6/2016 | 20.63 | 0    |
| 26/6/2016 | 19.85 | 0.8  |
| 27/6/2016 | 19.09 | 0.2  |

|           |       |      |
|-----------|-------|------|
| 28/6/2016 | 22.83 | 0    |
| 29/6/2016 | 24.51 | 0    |
| 30/6/2016 | 23.7  | 0.2  |
| 1/7/2016  | 21.88 | 0    |
| 2/7/2016  | 22.39 | 0    |
| 3/7/2016  | 24.96 | 0    |
| 4/7/2016  | 23.64 | 0    |
| 5/7/2016  | 23.75 | 0    |
| 6/7/2016  | 23.4  | 0    |
| 7/7/2016  | 22.65 | 0    |
| 8/7/2016  | 24.11 | 0    |
| 9/7/2016  | 25.35 | 0    |
| 10/7/2016 | 24.89 | 0    |
| 11/7/2016 | 23.46 | 30.6 |
| 12/7/2016 | 22.65 | 0.2  |
| 13/7/2016 | 21.53 | 1.2  |
| 14/7/2016 | 18.03 | 11   |
| 15/7/2016 | 19.33 | 2.6  |
| 16/7/2016 | 22.62 | 0.8  |
| 17/7/2016 | 21.83 | 0    |
| 18/7/2016 | 20.5  | 44.2 |
| 19/7/2016 |       |      |
| 20/7/2016 | 22.3  | 0    |
| 21/7/2016 | 23.19 | 0    |
| 22/7/2016 | 20.7  | 6.2  |
| 23/7/2016 | 22.08 | 0    |
| 24/7/2016 | 23.51 | 28   |
| 25/7/2016 | 22.69 | 0.2  |
| 26/7/2016 | 20.71 | 0.6  |
| 27/7/2016 | 22.36 | 0.2  |
| 28/7/2016 | 24.8  | 0    |
| 29/7/2016 | 25.21 | 0    |
| 30/7/2016 | 24.59 | 0    |
| 31/7/2016 | 23.13 | 0    |
| 1/8/2016  | 23.18 | 2.4  |
| 2/8/2016  | 23.37 | 0    |
| 3/8/2016  | 24.12 | 0    |
| 4/8/2016  | 23.07 | 0    |
| 5/8/2016  | 22.65 | 0    |
| 6/8/2016  | 21.08 | 0    |
| 7/8/2016  | 22.18 | 0    |
| 8/8/2016  | 22.22 | 0    |
| 9/8/2016  | 22.64 | 0    |
| 10/8/2016 | 23.96 | 0    |
| 11/8/2016 | 24.75 | 0    |
| 12/8/2016 | 26.08 | 0    |
| 13/8/2016 | 26.18 | 0    |
| 14/8/2016 | 27.75 | 0    |

|           |       |       |
|-----------|-------|-------|
| 15/8/2016 | 27.56 | 0     |
| 16/8/2016 | 26.98 | 0     |
| 17/8/2016 | 26.61 | 0     |
| 18/8/2016 | 25.38 | 0     |
| 19/8/2016 | 26.13 | 0     |
| 20/8/2016 | 27.01 | 0     |
| 21/8/2016 | 26.01 | 0     |
| 22/8/2016 | 25.63 | 0     |
| 23/8/2016 | 24.06 | 0     |
| 24/8/2016 | 24.87 | 0     |
| 25/8/2016 | 18.89 | 144.6 |
| 26/8/2016 | 18.56 | 0     |
| 27/8/2016 | 18.2  | 0     |
| 28/8/2016 | 18.8  | 0     |
| 29/8/2016 | 16.72 | 0.4   |
| 30/8/2016 | 17.62 | 0.2   |
| 31/8/2016 | 19.07 | 0     |
| 1/9/2016  | 19.25 | 0     |
| 2/9/2016  | 18.96 | 0     |
| 3/9/2016  | 18.46 | 0.8   |
| 4/9/2016  | 17.98 | 0     |
| 5/9/2016  | 18.53 | 0     |
| 6/9/2016  | 16.85 | 2.8   |
| 7/9/2016  | 16.03 | 0.2   |
| 8/9/2016  | 17.49 | 0     |
| 9/9/2016  | 15.8  | 2     |
| 10/9/2016 | 15.15 | 0.6   |
| 11/9/2016 | 16.75 | 0     |
| 12/9/2016 | 15.21 | 2.6   |
| 13/9/2016 | 15.81 | 0     |
| 14/9/2016 | 16.15 | 0     |
| 15/9/2016 | 16.16 | 0     |
| 16/9/2016 | 16.35 | 0     |
| 17/9/2016 | 17.38 | 1     |
| 18/9/2016 | 16.42 | 14.6  |
| 19/9/2016 | 16.45 | 0.2   |
| 20/9/2016 | 13.45 | 0.2   |
| 21/9/2016 | 14.92 | 0     |
| 22/9/2016 | 16.36 | 0.2   |
| 23/9/2016 | 18.12 | 0     |
| 24/9/2016 | 16.84 | 2.6   |
| 25/9/2016 | 15.04 | 0     |
| 26/9/2016 | 15.53 | 0     |
| 27/9/2016 | 15.28 | 0     |
| 28/9/2016 | 13.61 | 0     |
| 29/9/2016 | 12.93 | 0     |
| 30/9/2016 | 15.21 | 0     |
| 1/10/2016 | 17.1  | 0     |

|            |      |     |
|------------|------|-----|
| 2/10/2016  |      |     |
| 3/10/2016  | 19.1 | 0   |
| 4/10/2016  | 15   | 0.4 |
| 5/10/2016  | 7.4  | 1.2 |
| 6/10/2016  | 9.7  | 8   |
| 7/10/2016  | 12.7 | 7.8 |
| 8/10/2016  | 11.7 | 0   |
| 9/10/2016  | 9.8  | 3.8 |
| 10/10/2016 | 8.9  | 0   |
| 11/10/2016 | 10.3 | 0   |
| 12/10/2016 | 10.8 | 0.2 |
| 13/10/2016 | 9.9  | 0   |
| 14/10/2016 | 10.8 | 0.4 |
| 15/10/2016 | 10.2 | 3   |
| 16/10/2016 | 11.7 | 0   |
| 17/10/2016 | 10.7 | 0   |
| 18/10/2016 | 11.4 | 0   |
| 19/10/2016 | 11.7 | 0   |
| 20/10/2016 | 16.6 | 0   |
| 21/10/2016 | 12.3 | 2.8 |
| 22/10/2016 | 9.4  | 0.8 |
| 23/10/2016 | 8.3  | 2.8 |
| 24/10/2016 | 8.9  | 9   |
| 25/10/2016 | 6.6  | 0.2 |
| 26/10/2016 | 8.8  | 4.2 |
| 27/10/2016 | 6.6  | 6.4 |
| 28/10/2016 | 3.2  | 0   |
| 29/10/2016 | 4.3  | 0   |
| 30/10/2016 | 4.8  | 0   |
| 31/10/2016 | 5.9  | 0   |
| 1/11/2016  | 3.05 | 0   |
| 2/11/2016  | 4.26 | 0   |
| 3/11/2016  | 8.57 | 0   |
| 4/11/2016  | 9.42 | 0.4 |
| 5/11/2016  | 7.41 | 5.6 |
| 6/11/2016  | 6.64 | 8.6 |
| 7/11/2016  | 4.59 | 0.2 |
| 8/11/2016  | 2.44 | 0   |
| 9/11/2016  | 2.78 | 0   |
| 10/11/2016 | 6.6  | 0   |
| 11/11/2016 | 5.68 | 0   |
| 12/11/2016 | 4.4  | 1.8 |
| 13/11/2016 | 4.85 | 0   |
| 14/11/2016 | 4.96 | 0   |
| 15/11/2016 | 6.6  | 0   |
| 16/11/2016 | 4.29 | 0   |
| 17/11/2016 | 5.64 | 2.4 |
| 18/11/2016 | 5.18 | 0   |

|            |        |     |
|------------|--------|-----|
| 19/11/2016 | 5.38   | 0   |
| 20/11/2016 | 3.33   | 0   |
| 21/11/2016 | 4.93   | 0.2 |
| 22/11/2016 | 5.8    | 0   |
| 23/11/2016 | 5.5    | 3.8 |
| 24/11/2016 | 2.66   | 4.4 |
| 25/11/2016 | 0.51   | 0   |
| 26/11/2016 | -0.14  | 0   |
| 27/11/2016 | 1.3    | 0   |
| 28/11/2016 | 1.75   | 0   |
| 29/11/2016 | 2.75   | 0   |
| 30/11/2016 | 2.95   | 0   |
| 1/12/2016  | 3.96   | 0   |
| 2/12/2016  | 2.37   | 0   |
| 3/12/2016  | -1.23  | 0   |
| 4/12/2016  | -2.62  | 0   |
| 5/12/2016  | -0.2   | 0   |
| 6/12/2016  | -0.91  | 0   |
| 7/12/2016  | 0.89   | 0   |
| 8/12/2016  | -1.1   | 0   |
| 9/12/2016  | -0.02  | 0   |
| 10/12/2016 | 0.27   | 0   |
| 11/12/2016 | -0.31  | 0.4 |
| 12/12/2016 | -1.02  | 4.6 |
| 13/12/2016 | -1.78  | 2.6 |
| 14/12/2016 | -5.09  | 0   |
| 15/12/2016 | -5.48  | 0   |
| 16/12/2016 | -7.9   | 0   |
| 17/12/2016 | -10.19 | 0   |
| 18/12/2016 | -5.84  | 0   |
| 19/12/2016 | -3.3   | 0   |
| 20/12/2016 | -5.94  | 0   |
| 21/12/2016 | -2.79  | 0   |
| 22/12/2016 | -1.52  | 0   |
| 23/12/2016 | -4.84  | 0   |
| 24/12/2016 | -2.25  | 0   |
| 25/12/2016 | -2.18  | 0   |
| 26/12/2016 | -1.86  | 0   |
| 27/12/2016 | -1.42  | 0   |
| 28/12/2016 | -3.25  | 0   |
| 29/12/2016 | -1.91  | 0   |
| 30/12/2016 | -1.41  | 0   |
| 31/12/2016 | -0.46  | 0   |
| 1/1/2017   |        |     |
| 2/1/2017   |        |     |
| 3/1/2017   |        |     |
| 4/1/2017   |        |     |
| 5/1/2017   |        |     |

|           |       |     |
|-----------|-------|-----|
| 6/1/2017  |       |     |
| 7/1/2017  | -0.02 | 1.8 |
| 8/1/2017  | -0.05 | 0   |
| 9/1/2017  | -0.13 | 0.4 |
| 10/1/2017 | -0.03 | 0   |
| 11/1/2017 | -0.08 | 0   |
| 12/1/2017 | -0.49 | 0   |
| 13/1/2017 | -1.15 | 0   |
| 14/1/2017 | -1.29 | 0   |
| 15/1/2017 | -0.73 | 0   |
| 16/1/2017 | -1.69 | 0   |
| 17/1/2017 | -1.98 | 0   |
| 18/1/2017 | -0.98 | 0   |
| 19/1/2017 | -0.98 | 0   |
| 20/1/2017 | -1.94 | 0   |
| 21/1/2017 | -2.25 | 0   |
| 22/1/2017 | -1.64 | 0   |
| 23/1/2017 | -1.53 | 0   |
| 24/1/2017 | -0.71 | 0   |
| 25/1/2017 | -0.7  | 0   |
| 26/1/2017 | -0.2  | 0   |
| 27/1/2017 | -0.36 | 0   |
| 28/1/2017 | -0.12 | 0   |
| 29/1/2017 | -0.07 | 0   |
| 30/1/2017 | -0.2  | 0   |
| 31/1/2017 | -0.65 | 0   |
| 1/2/2017  | -1.45 | 0   |
| 2/2/2017  | -0.25 | 0   |
| 3/2/2017  | -0.22 | 0   |
| 4/2/2017  | -0.15 | 0   |
| 5/2/2017  | -0.03 | 0   |
| 6/2/2017  | 0     | 2.2 |
| 7/2/2017  | 0     | 2.4 |
| 8/2/2017  | 0.05  | 0.4 |
| 9/2/2017  | -0.04 | 0   |
| 10/2/2017 | -0.22 | 0   |
| 11/2/2017 | -0.29 | 0   |
| 12/2/2017 | -0.03 | 0   |
| 13/2/2017 | 0.09  | 0   |
| 14/2/2017 | 1.81  | 0   |
| 15/2/2017 | 2.59  | 0   |
| 16/2/2017 | 2.82  | 0   |
| 17/2/2017 | 3.89  | 0   |
| 18/2/2017 | 3.21  | 0   |
| 19/2/2017 | 3.94  | 0   |
| 20/2/2017 | 3.65  | 0   |
| 21/2/2017 | 1.17  | 8.4 |
| 22/2/2017 | 0.63  | 0   |



|           |       |      |
|-----------|-------|------|
| 23/2/2017 | 1.16  | 0    |
| 24/2/2017 | 1.76  | 0    |
| 25/2/2017 | 2.6   | 0    |
| 26/2/2017 | 3.04  | 0    |
| 27/2/2017 | 3.34  | 0    |
| 28/2/2017 | 3.89  | 0    |
| 1/3/2017  | 4.07  | 0    |
| 2/3/2017  | 3.16  | 0    |
| 3/3/2017  | 4.25  | 0    |
| 4/3/2017  | 4.12  | 0    |
| 5/3/2017  | 3.98  | 0    |
| 6/3/2017  | 3.44  | 0    |
| 7/3/2017  | 3.41  | 0    |
| 8/3/2017  | 3.74  | 0    |
| 9/3/2017  | 3.64  | 0    |
| 10/3/2017 | 4.49  | 0    |
| 11/3/2017 | 4.37  | 3.2  |
| 12/3/2017 | 3.32  | 20.6 |
| 13/3/2017 | 1.85  | 12.6 |
| 14/3/2017 | 1.55  | 0    |
| 15/3/2017 | 1.4   | 1.8  |
| 16/3/2017 | 1.33  | 0    |
| 17/3/2017 | 3.24  | 0    |
| 18/3/2017 | 4.3   | 0    |
| 19/3/2017 | 4.72  | 1.2  |
| 20/3/2017 | 5.45  | 0    |
| 21/3/2017 | 4.73  | 0    |
| 22/3/2017 | 5.97  | 1.6  |
| 23/3/2017 | 5.67  | 0.8  |
| 24/3/2017 | 4.29  | 0    |
| 25/3/2017 | 4.98  | 0    |
| 26/3/2017 | 5.87  | 0    |
| 27/3/2017 | 7.41  | 0    |
| 28/3/2017 | 8.52  | 0    |
| 29/3/2017 | 7.03  | 0.4  |
| 30/3/2017 | 8.76  | 5.2  |
| 31/3/2017 | 8.99  | 0    |
| 1/4/2017  | 8.83  | 0    |
| 2/4/2017  | 8.73  | 0    |
| 3/4/2017  | 9.19  | 2.4  |
| 4/4/2017  | 11.15 | 1.6  |
| 5/4/2017  | 12.1  | 0    |
| 6/4/2017  | 13.1  | 0    |
| 7/4/2017  | 13.23 | 0    |
| 8/4/2017  | 11.57 | 2    |
| 9/4/2017  | 10.69 | 8.2  |
| 10/4/2017 | 10.63 | 5.4  |
| 11/4/2017 | 12.05 | 0.2  |

|           |       |      |
|-----------|-------|------|
| 12/4/2017 | 11.66 | 0    |
| 13/4/2017 | 12.7  | 3    |
| 14/4/2017 | 13.22 | 0    |
| 15/4/2017 | 12.11 | 0    |
| 16/4/2017 | 11.34 | 0    |
| 17/4/2017 | 11.76 | 0    |
| 18/4/2017 | 14.03 | 0    |
| 19/4/2017 | 12.35 | 2    |
| 20/4/2017 | 10.8  | 0    |
| 21/4/2017 | 10.95 | 0    |
| 22/4/2017 | 11.26 | 1    |
| 23/4/2017 | 12.32 | 0    |
| 24/4/2017 | 13.51 | 0    |
| 25/4/2017 | 14.73 | 0    |
| 26/4/2017 | 12.43 | 0    |
| 27/4/2017 | 12.4  | 0    |
| 28/4/2017 | 12.86 | 0    |
| 29/4/2017 | 13.46 | 0    |
| 30/4/2017 | 13.86 | 0    |
| 1/5/2017  | 15.1  | 0    |
| 2/5/2017  | 14.46 | 7.6  |
| 3/5/2017  | 13.27 | 15.8 |
| 4/5/2017  | 14.19 | 0    |
| 5/5/2017  | 13.72 | 0    |
| 6/5/2017  | 13.03 | 0    |
| 7/5/2017  | 12.06 | 0    |
| 8/5/2017  | 12.2  | 0    |
| 9/5/2017  | 14.08 | 0    |
| 10/5/2017 | 14.04 | 0    |
| 11/5/2017 | 14.63 | 0    |
| 12/5/2017 | 15    | 0    |
| 13/5/2017 | 14.87 | 0    |
| 14/5/2017 | 14.95 | 0.4  |
| 15/5/2017 | 13.57 | 0.8  |
| 16/5/2017 | 14.79 | 0    |
| 17/5/2017 | 15.65 | 0    |
| 18/5/2017 | 16.73 | 7.2  |
| 19/5/2017 | 17.15 | 2.2  |
| 20/5/2017 | 17.35 | 0    |
| 21/5/2017 | 18.12 | 0    |
| 22/5/2017 | 16.18 | 17.6 |
| 23/5/2017 | 14.45 | 0    |
| 24/5/2017 | 15.06 | 0    |
| 25/5/2017 | 15.03 | 0    |
| 26/5/2017 | 15.89 | 0    |
| 27/5/2017 | 16.84 | 0    |
| 28/5/2017 | 17.34 | 0    |
| 29/5/2017 | 16.35 | 0.8  |

|           |       |      |
|-----------|-------|------|
| 30/5/2017 | 16.03 | 0.2  |
| 31/5/2017 | 17.2  | 0    |
| 1/6/2017  | 18.41 | 0    |
| 2/6/2017  | 18.14 | 0    |
| 3/6/2017  | 17.45 | 5    |
| 4/6/2017  | 15.99 | 43.4 |
| 5/6/2017  | 15.81 | 25.8 |
| 6/6/2017  | 16.99 | 0    |
| 7/6/2017  | 17.19 | 3.4  |
| 8/6/2017  | 17.54 | 1.6  |
| 9/6/2017  | 17.79 | 0.4  |
| 10/6/2017 | 17.12 | 0.2  |
| 11/6/2017 | 19.02 | 0    |
| 12/6/2017 | 20.58 | 0    |
| 13/6/2017 | 21.52 | 0    |
| 14/6/2017 | 21.79 | 0    |
| 15/6/2017 | 21.92 | 0    |
| 16/6/2017 | 23.12 | 0    |
| 17/6/2017 | 23.16 | 0    |
| 18/6/2017 | 23.35 | 0    |
| 19/6/2017 | 23.85 | 14.6 |
| 20/6/2017 | 22.51 | 0.2  |
| 21/6/2017 | 21.9  | 11   |
| 22/6/2017 | 22.53 | 1.4  |
| 23/6/2017 | 21.53 | 0.2  |
| 24/6/2017 | 20.83 | 0    |
| 25/6/2017 | 21.74 | 0    |
| 26/6/2017 | 22.54 | 0    |
| 27/6/2017 | 23.1  | 0    |
| 28/6/2017 | 23.29 | 0    |
| 29/6/2017 | 23    | 0    |
| 30/6/2017 | 22.66 | 0    |
| 1/7/2017  | 23.15 | 0    |
| 2/7/2017  | 23.85 | 0    |
| 3/7/2017  | 24.13 | 0    |
| 4/7/2017  | 23.5  | 0.2  |
| 5/7/2017  | 22.34 | 5.2  |
| 6/7/2017  | 22.88 | 1.6  |
| 7/7/2017  | 22.63 | 0    |
| 8/7/2017  | 22.27 | 0    |
| 9/7/2017  | 23.53 | 0    |
| 10/7/2017 | 23.73 | 0    |
| 11/7/2017 | 24.2  | 0    |
| 12/7/2017 | 25.07 | 0    |
| 13/7/2017 | 25.45 | 0    |
| 14/7/2017 | 25.8  | 0    |
| 15/7/2017 | 24.85 | 15.4 |
| 16/7/2017 | 24.78 | 0    |

|           |       |      |
|-----------|-------|------|
| 17/7/2017 | 24.26 | 4.8  |
| 18/7/2017 | 25.07 | 0    |
| 19/7/2017 | 26.13 | 0    |
| 20/7/2017 | 26.87 | 0    |
| 21/7/2017 | 27.77 | 0    |
| 22/7/2017 | 28.2  | 0    |
| 23/7/2017 | 28.1  | 0    |
| 24/7/2017 | 28.15 | 0    |
| 25/7/2017 | 27.77 | 0    |
| 26/7/2017 | 27.63 | 0    |
| 27/7/2017 | 26.98 | 2.4  |
| 28/7/2017 | 23.13 | 11.4 |
| 29/7/2017 | 23.49 | 0    |
| 30/7/2017 | 24.94 | 0    |
| 31/7/2017 | 24.95 | 0    |
| 1/8/2017  | 25.14 | 0    |
| 2/8/2017  | 26.34 | 0    |
| 3/8/2017  | 26.63 | 0    |
| 4/8/2017  | 26.36 | 0    |
| 5/8/2017  | 26.2  | 0    |
| 6/8/2017  | 25.44 | 2    |
| 7/8/2017  | 22.14 | 10.8 |
| 8/8/2017  | 22.23 | 0.2  |
| 9/8/2017  | 24.01 | 0    |
| 10/8/2017 | 23.88 | 0    |
| 11/8/2017 | 24.74 | 0    |
| 12/8/2017 | 25.17 | 1.8  |
| 13/8/2017 | 23.86 | 0.2  |
| 14/8/2017 | 23.34 | 0    |
| 15/8/2017 | 24.26 | 0    |
| 16/8/2017 | 25.55 | 0    |
| 17/8/2017 | 26.05 | 0    |
| 18/8/2017 | 24.11 | 19.4 |
| 19/8/2017 | 22.72 | 2    |
| 20/8/2017 | 22.4  | 20.2 |
| 21/8/2017 | 20.99 | 9.8  |
| 22/8/2017 | 20.56 | 40.4 |
| 23/8/2017 | 20.15 | 0    |
| 24/8/2017 | 21.52 | 0    |
| 25/8/2017 | 20.66 | 0    |
| 26/8/2017 | 19.16 | 2.6  |
| 27/8/2017 | 18.78 | 2    |
| 28/8/2017 | 18.48 | 4.4  |
| 29/8/2017 | 17.48 | 16.6 |
| 30/8/2017 | 16.63 | 17   |
| 31/8/2017 | 17.73 | 0    |
| 1/9/2017  | 18.25 | 0    |
| 2/9/2017  | 18.48 | 0    |

|            |       |      |
|------------|-------|------|
| 3/9/2017   | 19.46 | 0    |
| 4/9/2017   | 18.92 | 5.8  |
| 5/9/2017   | 17.93 | 6.2  |
| 6/9/2017   | 17.65 | 0    |
| 7/9/2017   |       |      |
| 8/9/2017   | 19.24 | 0    |
| 9/9/2017   | 18.33 | 1.4  |
| 10/9/2017  | 18.81 | 0.4  |
| 11/9/2017  |       |      |
| 12/9/2017  | 17.77 | 0    |
| 13/9/2017  | 18.18 | 0    |
| 14/9/2017  | 18.41 | 0    |
| 15/9/2017  |       |      |
| 16/9/2017  | 18.49 | 3.8  |
| 17/9/2017  | 18.47 | 0    |
| 18/9/2017  | 18.6  | 0.2  |
| 19/9/2017  | 18.77 | 0    |
| 20/9/2017  | 18.6  | 0    |
| 21/9/2017  | 17.76 | 0    |
| 22/9/2017  | 16.07 | 0.2  |
| 23/9/2017  | 15.63 | 0.2  |
| 24/9/2017  | 16.76 | 0    |
| 25/9/2017  | 17.95 | 3.6  |
| 26/9/2017  | 17.19 | 2.2  |
| 27/9/2017  | 17.12 | 1    |
| 28/9/2017  | 17.28 | 0.2  |
| 29/9/2017  | 18.67 | 0    |
| 30/9/2017  | 17.04 | 2.2  |
| 1/10/2017  | 17.25 | 0.4  |
| 2/10/2017  | 16.93 | 0.2  |
| 3/10/2017  | 13.8  | 31.4 |
| 4/10/2017  | 13.19 | 6.2  |
| 5/10/2017  | 13.23 | 0    |
| 6/10/2017  | 13.95 | 0    |
| 7/10/2017  | 14.55 | 1.2  |
| 8/10/2017  | 14.6  | 15.6 |
| 9/10/2017  | 12.12 | 10.4 |
| 10/10/2017 | 9.57  | 10   |
| 11/10/2017 | 8.68  | 1.6  |
| 12/10/2017 | 9.82  | 0    |
| 13/10/2017 | 11.01 | 0.6  |
| 14/10/2017 | 11.57 | 3.4  |
| 15/10/2017 | 11.53 | 0.6  |
| 16/10/2017 | 11.03 | 2.6  |
| 17/10/2017 | 10.54 | 0.8  |
| 18/10/2017 | 11.26 | 0    |
| 19/10/2017 | 11.8  | 0    |
| 20/10/2017 | 11.61 | 0    |

|            |       |     |
|------------|-------|-----|
| 21/10/2017 | 11.1  | 0   |
| 22/10/2017 | 10.71 | 0   |
| 23/10/2017 | 12.2  | 0   |
| 24/10/2017 | 12.31 | 0   |
| 25/10/2017 | 11.86 | 4.2 |
| 26/10/2017 | 10.75 | 0   |
| 27/10/2017 | 10.2  | 0   |
| 28/10/2017 | 10.33 | 0   |
| 29/10/2017 | 9.52  | 0   |
| 30/10/2017 | 9.71  | 1.2 |
| 31/10/2017 | 10.27 | 2.2 |
| 1/11/2017  | 10.92 | 0.4 |
| 2/11/2017  | 10.05 | 0   |
| 3/11/2017  | 9.68  | 0   |
| 4/11/2017  | 8.79  | 0   |
| 5/11/2017  | 9.21  | 0   |
| 6/11/2017  | 8.75  | 0   |
| 7/11/2017  | 9.09  | 0   |
| 8/11/2017  | 8.11  | 0   |
| 9/11/2017  | 8.54  | 0   |
| 10/11/2017 | 7.67  | 0   |
| 11/11/2017 | 5.6   | 0   |
| 12/11/2017 | 5.78  | 0   |
| 13/11/2017 | 5.57  | 0   |
| 14/11/2017 | 5.58  | 0   |
| 15/11/2017 | 5.15  | 0   |
| 16/11/2017 | 4.99  | 0   |
| 17/11/2017 | 6.3   | 0   |
| 18/11/2017 | 5.14  | 0   |
| 19/11/2017 | 4.7   | 1   |
| 20/11/2017 | 3.13  | 0   |
| 21/11/2017 | 4.46  | 0   |
| 22/11/2017 | 3.15  | 0   |
| 23/11/2017 | 2.23  | 0   |
| 24/11/2017 | 1.53  | 0   |
| 25/11/2017 | 1.05  | 0   |
| 26/11/2017 | 0.77  | 0   |
| 27/11/2017 | 1.32  | 0   |
| 28/11/2017 | 1.58  | 0   |
| 29/11/2017 | 2.47  | 0   |
| 30/11/2017 | 1.58  | 0   |
