# Supplementary material
Source: publisher figshare collection journal article supplement (https://plos.figshare.com/articles/dataset/_/6107861)
Supplement: Supplementary file [file 1]

| Date       | Soil temperature_Upper/ °C | SE1     | Soil temperature_Lower/ °C | SE2    |
|------------|----------------------------|---------|----------------------------|--------|
| 8/5/2014   | 11.8667                    | 0.1247  | 12.5833                    | 0.2694 |
| 12/5/2014  | 14.1                       | 0.9327  | 15                         | 1.778  |
| 15/5/2014  | 16.3                       | 1.6649  | 18.1667                    | 1.4496 |
| 22/5/2014  | 20.7667                    | 1.0405  | 20.5                       | 0.8177 |
| 23/5/2014  | 16.9167                    | 0.2181  | 17.6667                    | 0.5458 |
| 25/5/2014  | 17.3                       | 0.6779  | 16.7667                    | 0.7355 |
| 15/6/2014  | 23.55                      | 0.8499  | 23.3333                    | 0.8585 |
| 20/6/2014  | 20.6667                    | 0.5574  | 20.7167                    | 0.6591 |
| 30/6/2014  | 23.6                       | 0.5275  | 23.5167                    | 0.9595 |
| 11/7/2014  | 24.4167                    | 6.5276  | 26.15                      | 0.3295 |
| 12/7/2014  | 24.7                       | 0.97    | 25.9833                    | 0.3355 |
| 13/7/2014  | 23.8167                    | 1.9429  | 25.3167                    | 0.6074 |
| 14/7/2014  | 21.4167                    | 0.7489  | 23.1833                    | 1.038  |
| 15/7/2014  | 25.9667                    | 0.2329  | 26.7333                    | 0.6402 |
| 16/7/2014  | 26.65                      | 1.7836  | 26.85                      | 0.6223 |
| 23/7/2014  | 27.05                      | 0.9092  | 28.8667                    | 0.4686 |
| 27/7/2014  | 28.8333                    | #DIV/0! | 26.6                       | 0.0408 |
| 10/8/2014  | 22.2                       | 0.1075  | 22.1167                    | 0.3477 |
| 14/8/2014  | 21.9667                    | 0.7939  | 22.2167                    | 0.6071 |
| 24/8/2014  | 21.5333                    | 1.2246  | 22.6333                    | 0.8708 |
| 20/9/2014  | 18.7833                    | 0.3472  | 19.8                       | 0.2959 |
| 26/9/2014  | 18.65                      | 1.0626  | 18.6                       | 0.8698 |
| 5/10/2014  | 17                         | 0.8446  | 17.6333                    | 0.6361 |
| 17/10/2014 | 13.5333                    | 0.3107  | 14.6                       | 0.6465 |
| 31/10/2014 | 9.1                        | 0.2652  | 9.7167                     | 0.7234 |
| 24/12/2014 | 2.4333                     | 0.5582  | 2.2                        | 1.1958 |
|            |                            |         |                            |        |
| 10/3/2015  | 8.8167                     | 0.6904  | 7.6667                     | 1.0922 |
| 28/3/2015  | 11.3167                    | 0.928   | 11.2333                    | 0.5457 |
| 10/4/2015  | 13.5333                    | 0.5397  | 11.9833                    | 0.8942 |
| 23/4/2015  | 15.2833                    | 0.3736  | 14.7833                    | 0.7321 |
| 8/5/2015   | 18.6667                    | 1.1435  | 18.6333                    | 0.3215 |
| 18/5/2015  | 23.1667                    | 0.1225  | 22.7833                    | 0.0408 |
| 6/6/2015   | 23.5833                    | 0.148   | 25.0667                    | 0.4057 |
| 10/6/2015  | 19.8333                    | 0.9675  | 22.6667                    | 0.7014 |
| 24/6/2015  | 21.6333                    | 0.9025  | 22.0833                    | 0.4631 |
| 27/6/2015  | 23.7833                    | 0.4111  | 24.8167                    | 0.3357 |
| 1/7/2015   | 25.7167                    | 0.1856  | 26.2                       | 0.1202 |
| 5/7/2015   | 30.4167                    | 0.6969  | 30.45                      | 0.3496 |
| 8/7/2015   | 25.3167                    | 0.949   | 25.4833                    | 1.1971 |
| 14/7/2015  | 25.5667                    | 1.3775  | 27.2                       | 0.8    |
| 26/7/2015  | 27.35                      | 1.3676  | 30.05                      | 1.3821 |
| 12/8/2015  | 22.4                       | 0.1581  | 22.65                      | 0.1011 |
| 22/8/2015  | 23.7833                    | 0.0675  | 24.65                      | 0.2852 |
| 26/8/2015  | 23.8167                    | 1.075   | 26.5                       | 1.1211 |
| 6/9/2015   | 22.0667                    | 1.5482  | 24.2667                    | 0.5645 |
| 13/9/2015  | 18.6667                    | 0.6491  | 20.1833                    | 0.3961 |

|            |         |        |         |        |
|------------|---------|--------|---------|--------|
| 16/9/2015  | 20.35   | 0.557  | 22.3667 | 0.4512 |
| 17/9/2015  | 18.5667 | 0.3266 | 19.5667 | 0.5029 |
| 19/9/2015  | 19.4    | 0.6812 | 20.45   | 0.6925 |
| 26/9/2015  | 18.88   | 0.4079 | 19.775  | 1.4177 |
| 14/10/2015 | 13.9333 | 2.3032 | 13.8667 | 1.6992 |
| 7/12/2015  | 2.4333  | 0.2495 | 2.2     | 0.0789 |
| 13/3/2016  | 4.7833  | 0.9372 | 3.7167  | 0.9113 |
| 14/4/2016  | 16.2167 | 0.6467 | 14.1667 | 0.3559 |
| 17/4/2016  | 12.7333 | 0.5434 | 13.9833 | 0.4238 |
| 21/6/2016  | 22.2333 | 1.7802 | 22.4167 | 2.0151 |
| 27/6/2016  | 23.7833 | 1.3926 | 24.8167 | 2.2148 |
| 1/7/2016   | 29.45   | 1.0255 | 30.8667 | 1.4159 |
| 8/7/2016   | 25.3167 | 0.7428 | 25.4833 | 1.4013 |
| 25/7/2016  | 26.6    | 0.0882 | 28.9    | 0.1202 |
| 27/7/2016  | 28.6667 | 1.4121 | 28.95   | 1.3979 |
| 5/8/2016   | 26.75   | 0.4543 | 28.2333 | 0.6773 |
| 21/8/2016  | 31.35   | 2.0742 | 30.9167 | 1.1116 |
| 22/8/2016  | 23.7833 | 1.0398 | 24.65   | 0.4899 |
| 26/8/2016  | 17.5667 | 1.1076 | 18.5833 | 0.7796 |
| 7/9/2016   | 28.9667 | 0.1386 | 26.9167 | 0.1814 |
| 8/9/2016   | 21.05   | 0.6205 | 22.4833 | 0.1729 |
| 13/9/2016  | 18.6667 | 0.3572 | 20.1833 | 0.2271 |
| 17/9/2016  | 18.5667 | 0.8536 | 19.5667 | 0.688  |
| 19/9/2016  | 19.4    | 0.4701 | 20.45   | 0.4434 |
| 20/9/2016  | 16.3    | 0.1567 | 17.0333 | 0.073  |
| 21/9/2016  | 18.6667 | 0.4472 | 20.1667 | 0.4725 |
| 22/9/2016  | 17.9    | 1.1488 | 18.8333 | 0.6913 |
| 7/10/2016  | 14.7167 | 0.3129 | 15.5333 | 0.1434 |
| 8/10/2016  | 15.2333 | 0.6129 | 15.7833 | 0.2415 |
| 18/10/2016 | 14.65   | 0.2797 | 16.25   | 0.1265 |
| 30/10/2016 | 8.3     | 1.0195 | 8.9     | 0.8903 |
| 16/11/2016 | 9.7333  | 0.9924 | 10.2833 | 1.4163 |

| Soil moisture_Upper/WFPS% | SE1    | Soil moisture_Lower/WFPS% | SE2    |
|---------------------------|--------|---------------------------|--------|
| 26.3209                   | 1.5137 | 28.492                    | 3.1968 |
| 18.4202                   | 1.6149 | 19.8079                   | 1.8276 |
| 31.1106                   | 1.1211 | 23.6799                   | 1.6482 |
| 20.9493                   | 1.973  | 23.568                    | 1.6331 |
| 19.8974                   | 1.9884 | 16.652                    | 2.6628 |
| 31.1106                   | 1.5471 | 34.4679                   | 1.9863 |
| 17.4802                   | 1.2772 | 22.6951                   | 1.5838 |
| 30.4168                   | 1.433  | 32.3864                   | 3.1902 |
| 21.2627                   | 2.1774 | 23.7694                   | 1.4677 |
| 42.9058                   | 1.0344 | 41.3391                   | 1.6703 |
| 39.28                     | 2.1794 | 38.1609                   | 1.4269 |
| 35.5422                   | 2.2284 | 38.2952                   | 2.6976 |
| 47.2927                   | 1.7037 | 48.2998                   | 1.5135 |
| 39.7948                   | 1.4995 | 40.9139                   | 1.309  |
| 27.261                    | 1.3939 | 30.5735                   | 3.1044 |
| 27.0372                   | 2.3127 | 27.3953                   | 1.7406 |
| 9.2437                    | 1.9497 | 13.0709                   | 1.8497 |
| 38.2728                   | 2.0093 | 43.152                    | 1.8551 |
| 29.5215                   | 1.1999 | 40.8243                   | 1.9812 |
| 23.0084                   | 1.4993 | 31.8716                   | 1.0014 |
| 39.1233                   | 2.5111 | 45.4797                   | 2.2021 |
| 39.3919                   | 1.0085 | 43.5101                   | 1.88   |
| 32.3416                   | 1.382  | 41.5853                   | 1.15   |
| 28.5815                   | 1.7121 | 34.9603                   | 2.6364 |
| 36.527                    | 1.3988 | 40.9139                   | 1.1358 |
| 25.2466                   | 0.7257 | 26.9253                   | 1.3226 |
| 24.4633                   | 0.4082 | 31.4911                   | 1.2728 |
| 34.0427                   | 0.8057 | 41.3839                   | 2.0222 |
| 30.4392                   | 1.5903 | 38.3399                   | 1.1619 |
| 31.6254                   | 1.4886 | 37.0194                   | 1.1225 |
| 18.1292                   | 1.2152 | 22.2922                   | 1.1026 |
| 13.4291                   | 3.5773 | 14.5545                   | 2.5696 |
| 25.9628                   | 2.1751 | 34.647                    | 2.9799 |
| 20.6807                   | 3.5286 | 25.0228                   | 1.3636 |
| 30.7302                   | 1.9401 | 30.2601                   | 2.0942 |
| 19.114                    | 2.4255 | 18.6888                   | 1.9788 |
| 33.0355                   | 1.8871 | 38.2728                   | 1.3627 |
| 10.8328                   | 1.5719 | 10.9223                   | 2.7593 |
| 10.1837                   | 2.418  | 11.0342                   | 1.6027 |
| 11.9071                   | 2.344  | 18.174                    | 1.3856 |
| 11.1014                   | 1.2094 | 16.2492                   | 2.364  |
| 39.8843                   | 1.7019 | 44.9426                   | 1.6088 |
| 11.4694                   | 0.8036 | 14.9063                   | 0.7405 |
| 12.3995                   | 0.6928 | 17.7711                   | 0.971  |
| 23.7694                   | 0.6686 | 31.7821                   | 1.1476 |
| 27.3953                   | 1.0113 | 24.6423                   | 1.6881 |

|         |        |         |        |
|---------|--------|---------|--------|
| 22.9637 | 3.0538 | 23.2323 | 1.7308 |
| 25.2019 | 1.7378 | 26.6343 | 2.0705 |
| 34.0427 | 1.5132 | 34.8708 | 2.8977 |
| 27.9772 | 2.2493 | 33.4831 | 1.8048 |
| 11.3699 | 1.2826 | 12.7576 | 1.2163 |
| 25.2466 | 1.3743 | 26.9253 | 1.3191 |
| 26.7462 | 1.2182 | 33.2369 | 1.2349 |
| 22.807  | 2.4295 | 20.5465 | 1.5759 |
| 34.2217 | 2.2953 | 35.7437 | 1.5829 |
| 21.7551 | 1.4665 | 19.0693 | 2.3232 |
| 19.114  |        | 18.6888 |        |
| 12.4443 | 0.0577 | 13.1381 | 1.0739 |
| 10.1837 | 0.8311 | 11.0342 | 0.8031 |
| 26.5224 | 0.2462 | 28.8725 | 2.0415 |
| 37.5342 | 2.2022 | 40.1081 | 4.38   |
| 21.5313 | 1.2258 | 17.5473 | 1.4599 |
| 10.8775 | 2.2175 | 11.7728 | 1.3874 |
| 11.4694 | 2.0942 | 14.9063 | 2.952  |
| 42.8163 | 1.647  | 42.4582 | 1.3928 |
| 24.5976 | 1.775  | 24.3514 | 1.1263 |
| 25.4257 | 1.1184 | 27.0819 | 1.3328 |
| 27.3953 | 2.503  | 24.6423 | 2.3408 |
| 25.2019 | 2.4712 | 26.6343 | 3.4628 |
| 34.0427 | 4.0792 | 34.8708 | 1.8306 |
| 34.097  | 3.303  | 33.0579 | 1.7918 |
| 33.9979 | 2.1892 | 34.1546 | 4.0025 |
| 31.6702 | 2.2693 | 30.5511 | 2.7294 |
| 43.1744 | 1.9271 | 42.8163 | 3.4297 |
| 39.4367 | 0.9633 | 39.6829 | 0.6861 |
| 27.7981 | 3.1288 | 35.0498 | 2.968  |
| 38.4519 | 2.2573 | 42.1225 | 2.765  |
| 26.7014 |        | 29.4096 |        |

| Rs_Upper/ $\mu\text{mol m}^{-2} \text{ s}^{-1}$ | SE1    | Rs_Lower/ $\mu\text{mol m}^{-2} \text{ s}^{-1}$ | SE2      |
|-------------------------------------------------|--------|-------------------------------------------------|----------|
| 1.09                                            | 0.0695 | 3.4275                                          | 0.183    |
| 0.875                                           | 0.2334 | 2.0825                                          | 0.3799   |
| 1.675                                           | 0.6713 | 2.725                                           | 0.576    |
| 1.39                                            | 0.1371 | 2.825                                           | 0.1405   |
| 2.435                                           | 0.066  | 3.38                                            | 0.3927   |
| 1.8525                                          | 0.1464 | 3.475                                           | 0.2226   |
| 1.6175                                          | 0.2148 | 3.3667                                          | 0.3774   |
| 3.2725                                          | 0.1846 | 4.3825                                          | 0.8416   |
| 2.6225                                          | 1.2745 | 3.725                                           | 0.2105   |
| 1.45                                            | 0.2514 | 3.765                                           | 0.411    |
| 3.415                                           | 0.2472 | 4.9                                             | 0.1495   |
| 2.805                                           | 0.3695 | 3.745                                           | 0.3841   |
| 1.79                                            | 0.1486 | 3.35                                            | 0.0759   |
| 5.225                                           | 0.1626 | 6.375                                           | 0.2931   |
| 5.055                                           | 0.4498 | 6.55                                            | 0.4027   |
| 5.1125                                          | 0.0635 | 6.5325                                          | 0.0927   |
| 1.1375                                          | 0      | 2.4775                                          | 0.693    |
| 3.125                                           | 0.3641 | 4.52                                            | 0.2035   |
| 3.3225                                          | 0.0794 | 4.9925                                          | 0.3262   |
| 2.1933                                          | 0.1518 | 3.71                                            | 0.4818   |
| 1.55                                            | 0.1806 | 2.9667                                          | 0.0492   |
| 1.145                                           | 0.0472 | 2.425                                           | 0.0458   |
| 1.015                                           | 0.1013 | 2.3625                                          | 0.0365   |
| 1.075                                           | 0.079  | 1.925                                           | 0.1085   |
| 0.5675                                          | 0.1606 | 1.675                                           | 0.1291   |
| 0.262                                           | 0.0763 | 0.33                                            | 0.0789   |
| 0.37                                            | 0.1228 | 0.83                                            | 0.1615   |
| 0.9183                                          | 0.2376 | 1.725                                           | 0.1382   |
| 0.87                                            | 0.1471 | 1.43                                            | 0.2868   |
| 0.7925                                          | 0.0988 | 1.4075                                          | 0.3576   |
| 1.0975                                          | 0.1302 | 2.1475                                          | 0.2738   |
| 0.95                                            | 0.2295 | 2.025                                           | 0.4714   |
| 2.9175                                          | 0.2914 | 4.155                                           | 0.4138   |
| 2.045                                           | 0.0566 | 3.715                                           | 0.0141   |
| 2.2575                                          | 0.2085 | 3.7325                                          | 0.3203   |
| 2.2625                                          | 0.1131 | 3.3                                             | 0.2192   |
| 2.9725                                          | 0.0141 | 4.2475                                          | 0.1273   |
| 1.0225                                          | 0.0416 | 2.225                                           | 7.07E-03 |
| 1.425                                           | 0.0424 | 1.905                                           | 0.0283   |
| 1.75                                            | 0.05   | 2.97                                            | 0.0493   |
| 2.0275                                          | 0.2313 | 2.92                                            | 0.2996   |
| 0.75                                            | 0.2765 | 1.6                                             | 0.0678   |
| 1.29                                            | 0.11   | 2.125                                           | 0.1533   |
| 1.33                                            | 1.3257 | 2.205                                           | 0.1575   |
| 1.53                                            | 0.2656 | 2.35                                            | 0.1846   |
| 2.7725                                          | 0.1678 | 3.1575                                          | 0.067    |

|         |        |        |        |
|---------|--------|--------|--------|
| 2.2475  | 0.452  | 3.175  | 0.4588 |
| 1.7075  | 0.1714 | 3.1    | 1.0928 |
| 1.2375  | 0.2323 | 2.8325 | 0.1658 |
| 0.7633  | 0.2169 | 1.465  | 0.065  |
| 0.39    | 0.4639 | 0.84   | 0.724  |
| -0.0275 | 0.2722 | 0.6333 | 0.1168 |
| 1.065   | 0.0585 | 1.5025 | 0.3057 |
| 0.57    | 0.3604 | 1.95   | 0.4957 |
| 1.3075  | 0.5512 | 2.595  | 0.5587 |
| 2.985   | 1.1826 | 3.65   | 0.3293 |
| 2.2625  | 0.978  | 2.93   | 0.2716 |
| 1.2675  | 0.637  | 2.265  | 0.1898 |
| 1.425   | 1.6532 | 1.805  | 0.484  |
| 4.435   | 1.4119 | 5.8325 | 0.289  |
| 5.2575  | 1.4364 | 6.5225 | 0.7644 |
| 2.24    | 1.2519 | 4.595  | 0.2326 |
| 1.57    | 0.2687 | 2.3725 | 0.0919 |
| 1.29    | 0.9649 | 2.125  | 0.5709 |
| 0.7875  | 0.7351 | 1.9725 | 0.101  |
| 3.125   | 0.3626 | 5.0875 | 0.3119 |
| 3.5025  | 0.3606 | 4.2625 | 0.997  |
| 2.7725  | 0.2918 | 3.1575 | 0.1445 |
| 1.7075  | 0.2642 | 3.1    | 0.1112 |
| 1.2375  | 0.0896 | 2.8325 | 0.1436 |
| 0.955   | 0.3217 | 2.435  | 1.6018 |
| 2.885   | 0.2237 | 3.85   | 0.195  |
| 2.215   | 0.2136 | 3.365  | 0.306  |
| 0.5975  | 0.1297 | 1.825  | 0.5784 |
| 1.3675  | 0.3226 | 2.75   | 0.2916 |
| 1.15    | 0.0785 | 1.91   | 0.2387 |
| 0.56    | 0.175  | 1.24   | 0.8784 |
| 0.9     | 0.1266 | 1.525  | 0.3975 |
