# Supplementary material
Source: publisher figshare collection journal article supplement (https://plos.figshare.com/articles/dataset/_/6107861)
Supplement: Supplementary file [file 1]

| Bacterial phyla  | Abundance_Upper/% SE1 |        | Abundance_Lower/% SE2 |        |
|------------------|-----------------------|--------|-----------------------|--------|
| Firmicutes       | 0.9434                | 0.1643 | 0.8766                | 0.053  |
| Verrucomicrobia  | 1.7793                | 0.4675 | 1.9737                | 0.0883 |
| Bacteroidetes    | 2.6308                | 0.2031 | 2.7147                | 0.1667 |
| Chloroflexi      | 3.5677                | 0.4047 | 4.2835                | 0.2272 |
| Nitrospirae      | 3.6008                | 0.0796 | 2.8403                | 0.0806 |
| Planctomycetes   | 2.8624                | 0.8826 | 3.6767                | 0.3318 |
| Gemmatimonadetes | 10.3509               | 0.4049 | 7.7578                | 0.1607 |
| Actinobacteria   | 20.0769               | 2.1749 | 21.2674               | 0.6674 |
| Acidobacteria    | 13.6252               | 1.7544 | 18.6025               | 0.6267 |
| Proteobacteria   | 36.46                 | 1.83   | 31.3953               | 0.2466 |

| Fungal phyla  | Abuandance_Upper/% | SE1    | Abundance_Lower/% | SE2    |
|---------------|--------------------|--------|-------------------|--------|
| Ascomycota    | 14.5246            | 4.8316 | 22.812            | 7.1643 |
| Zygomycota    | 4.7184             | 1.5655 | 36.4706           | 8.2984 |
| Basidiomycota | 46.8281            | 6.7038 | 10.9062           | 1.348  |
